# Supplementary material for: Self-stacked multilayer FeOCl supported on a cellulose-derived carbon aerogel: a new and high-performance anode material for supercapacitors
Source: Royal Society of Chemistry journal article supplement (doi:10.1039/c8ta12261j), 2019-01-01
Supplement: c8ta12261j1.pdf [file c8ta12261j1.pdf]

## Supporting Information

### **Self-stacked multilayer FeOCl supported on a cellulose-derived carbon aerogel: A new and high-performance anode material for supercapacitors**

*Caichao Wan,<sup>\*a</sup> Yue Jiao,<sup>b</sup> Wenhui Bao,<sup>b</sup> He Gao,<sup>b</sup> Yiqiang Wu,<sup>\*a</sup> Jian Li<sup>\*b</sup>*

<sup>a</sup>College of Materials Science and Engineering, Central South University of Forestry and Technology, Changsha 410004, P. R. China

<sup>b</sup>Material Science and Engineering College, Northeast Forestry University, Harbin 150040, P. R. China

\*Corresponding authors. E-mails: [wancaichaojy@163.com](mailto:wancaichaojy@163.com) (C. Wan);

[wuyq0506@126.com](mailto:wuyq0506@126.com) (Y. Wu); [nefulijian@163.com](mailto:nefulijian@163.com) (J. Li)

## Outlines

|                                                                                                      |    |
|------------------------------------------------------------------------------------------------------|----|
| 1. Experimental Section.....                                                                         | 3  |
| 2. Calculation of interlayer spacing of the FeOCl (Figure S1) .....                                  | 7  |
| 3. Raman spectra of CDCA, FeOCl and FeOCl@CDCA (Figure S2) .....                                     | 8  |
| 4. Morphology of CDCA (Figure S3) .....                                                              | 10 |
| 5. Surface area and pore size distribution of CDCA (Figure S4) .....                                 | 11 |
| 6. CV curves of the Ni foam (Figure S5) .....                                                        | 13 |
| 7. CV curves of CDCA and FeOCl electrodes (Figure S6 and S7) .....                                   | 14 |
| 8. XPS spectrum of FeOCl@CDCA after electrochemical tests (Figure S8) .....                          | 16 |
| 9. CV and GCD plots of FeOCl@CDCA electrode tested in MgSO <sub>4</sub> electrolyte (Figure S9)..... | 18 |
| 10. Calculation of apparent diffusion coefficients (Figure S10) .....                                | 19 |
| 11. GCD plots of CDCA and FeOCl electrodes (Figure S11) .....                                        | 20 |
| 12. Cycle stability and coulombic efficiency of the FeOCl electrode (Figure S12) .....               | 21 |
| 13. Calculation of FeOCl theoretical specific capacitance .....                                      | 22 |
| 14. Electrochemical properties of the MnO <sub>2</sub> electrode (Figure S13).....                   | 23 |
| 15. Tables (Table S1 and S2).....                                                                    | 25 |
| References.....                                                                                      | 27 |

## 1. Experimental Section

**Reagents and materials:** Chemicals including sodium sulfate ( $\text{Na}_2\text{SO}_4$ ), magnesium sulfate ( $\text{MgSO}_4$ ), sodium hydroxide ( $\text{NaOH}$ ), polyethylene glycol-4000 (PEG-4000), tert-butyl alcohol,  $\alpha\text{-Fe}_2\text{O}_3$ , anhydrous  $\text{FeCl}_3$  and manganese dioxide ( $\text{MnO}_2$ ) were obtained from Shanghai Aladdin Industrial Inc. (China). Bamboo fiber was supplied by Zhejiang Mingtong Textile Technology Co., Ltd. and further washed several times with distilled water and dried at 60 °C for 24 h. The dried bamboo fiber was directly used as cellulose feedstock without further purification. Polytetrafluoroethylene (PTFE) plates were purchased from Dahua Plastic Industry Co., Ltd. (Hangzhou, China). Superfine acetylene black, nickel (Ni) foam and PTFE binder were supplied by China New Metal Materials Technology Co., Ltd.

**Preparation of  $\text{FeOCl}$ :** The preparation of  $\text{FeOCl}$  was carried out via a chemical-vapor-transport technique.<sup>1</sup>  $\alpha\text{-Fe}_2\text{O}_3$  was mixed with anhydrous  $\text{FeCl}_3$  based on a molar ratio of 1:1.3. The obtained powder was sealed in a glass container. The sealed container was transferred to a muffle furnace and then heated to 380°C for 40 h. After washing with anhydrous acetone for the removal of excess  $\text{FeCl}_3$  and vacuum drying at 40°C overnight, dark purple powder was obtained finally.

**Preparation of  $\text{FeOCl@CDCA}$ :** The synthesis of cellulose aerogel (the precursor of cellulose-derived carbon aerogel, CDCA) primarily includes three procedures: (1) dissolving the bamboo fiber in the solution of  $\text{NaOH}$  and PEG-4000; (2) regenerating the cellulose solution in a 1 v%  $\text{HCl}$  solution; (3) freeze-drying the resultant cellulose hydrogel after the solution replacement with tertiary butanol. The cellulose aerogel was

pyrolyzed to acquire CDCA under nitrogen environment. Detailed process is available in our previous reports.<sup>2-4</sup> CDCA and FeOCl were mixed by ball-milling with a mass ratio of 1:4. The ball-milling was performed in a planetary ball-mill (Changsha Deco Equipment Co., Ltd, China) with a rotation speed of 250 r/min using a 50 ml zirconia vial with zirconia balls (10 mm in diameter) under an argon atmosphere. The ball to powder ratio is 40:1 and the milling time is 1 h.

***Fabrication of anode, cathode and ASC device:*** The FeOCl@CDCA, acetylene black and PTFE were mixed in a mass ratio of 70:20:10 and then ground in alcohol. It is worth mentioning that the addition of superfine acetylene black with a high electrical conductivity of  $\sim 400 \text{ S m}^{-1}$  is helpful to ensure high inter-particle electric conductivity (like tunnel current), notwithstanding that CDCA is also conductive. The resultant slurry was pasted and pressed onto a Ni foam substrate at 10 MPa and then dried at 80 °C overnight, acting as an anode. A cheap and commercially available  $\text{MnO}_2$  powder was also mixed with acetylene black and PTFE and the mixture was pressed onto a Ni foam according to the above process. This  $\text{MnO}_2$  electrode serves as a cathode. The exposed geometric area of these electrodes equals to  $1 \times 1 \text{ cm}^2$ . For the assembly of an asymmetric supercapacitor (ASC), a piece of common and thin cellulose paper acts as a separator. These electrodes and separator were sandwiched between two PTFE plates and the whole device was clamped by a high-strength plastic clamp.

***Characterizations:*** Morphology was observed by a scanning electron microscope (SEM, Hitachi S4800). Transmission electron microscope (TEM) were performed with a FEI, Tecnai G2 F20 TEM with a field-emission gun operating at 200 kV. X-ray

diffraction (XRD) analysis was implemented on a Bruker D8 Advance TXS XRD instrument with Cu K $\alpha$  (target) radiation ( $\lambda = 1.5418 \text{ \AA}$ ) at a scan rate ( $2\theta$ ) of  $4^\circ \text{ min}^{-1}$  and a scan range from  $5$  to  $90^\circ$ . X-ray photoelectron spectroscopy (XPS) was carried out on a Thermo Escalab 250Xi system using a spectrometer with a dual Al K $\alpha$  X-ray source. Deconvolution of overlapped peaks was performed by a mixed Gaussian–Lorentzian fitting program (Origin 9.0, Originlab Corporation). N $_2$  adsorption–desorption tests were performed at  $-196^\circ\text{C}$  on an accelerated surface area and porosimetry system (3H-2000PS2 unit, Beishide Instrument S&T Co., Ltd). Raman spectrum was measured using a Raman spectrometer (Renishaw, inVia) with a 633 nm He-Ne laser. Electrical conductivity was tested using a H7756 four-point probe resistivity meter with a testing range of  $10^{-5}\sim 10^5 \text{ S cm}^{-1}$  (Beijing Heng Odd Instrument Co., Ltd) at room temperature.

***Electrochemical characterizations:*** Electrochemical properties of FeOCl@CDCA electrode were investigated by a CS350 electrochemical workstation (Wuhan CorrTest Instruments Corp., Ltd., China) in a three-electrode system: FeOCl@CDCA serves as the working electrode, and an Ag/AgCl electrode and a Pt foil serve as reference and counter electrodes, respectively. The electrolyte is 1 M Na $_2$ SO $_4$  aqueous solution. Cyclic voltammetry (CV) and galvanostatic charge–discharge (GCD) plots were tested over the potential window of  $-1$  to  $0 \text{ V}$ . Electrochemical impedance spectroscopy (EIS) tests were carried out in the frequency range from  $10^5$  to  $0.01 \text{ Hz}$  with alternate current amplitude of  $5 \text{ mV}$ . The exposed geometric area of FeOCl@CDCA working electrode is equal to  $1\times 1 \text{ cm}^2$  and the mass loading of electrochemically active substance (i.e., FeOCl and CDCA) per area is  $\sim 2.5 \text{ mg cm}^{-2}$ . Also, the mass loading of active substance

per area is controlled to be  $\sim 2.5 \text{ mg cm}^{-2}$  for CDCA, FeOCl and  $\text{MnO}_2$  electrodes (these materials also underwent the ball-milling treatment before mixing with the PTFE and acetylene black). The working potential window of the FeOCl and CDCA electrodes is same with that of FeOCl@CDCA electrode, while the working potential window of the  $\text{MnO}_2$  electrode is 0–0.8 V. For the  $\text{MnO}_2/\text{FeOCl@CDCA}$  ASC device, it was soaked in an aqueous electrolyte of 1 M  $\text{Na}_2\text{SO}_4$  for all of the electrochemical tests in a two-electrode system. The geometric area of ASC equals to  $1 \times 1 \text{ cm}^2$ .

**Calculations:** For CDCA, FeOCl, FeOCl@CDCA and  $\text{MnO}_2$  electrodes and the assembled ASC, the gravimetric ( $C_m$ ,  $\text{F g}^{-1}$ ) and areal ( $C_s$ ,  $\text{F cm}^{-2}$ ) specific capacitances are calculated based on GCD curves at different current densities according to following equations:<sup>5</sup>

$$C_m = I\Delta t / m\Delta V \quad \text{or} \quad C_s = I\Delta t / s\Delta V \quad (1)$$

where  $I$  (A) is the discharge current,  $\Delta t$  (s) is the discharge time,  $m$  (g) is the mass of active materials,  $s$  is the specific area ( $\text{cm}^2$ ), and  $\Delta V$  (V) is the operation discharge voltage window. For the ASC,  $m$  (g) is the total mass of active materials in both anode and cathode electrodes (namely 5 mg).

The areal ( $E_s$ ) or gravimetric ( $E_g$ ) energy density and areal ( $P_s$ ) or gravimetric ( $P_g$ ) power density are evaluated on the basis of capacitance values shown as follows:<sup>6</sup>

$$E_s = \frac{1}{2} C_s (\Delta V)^2 / 3600 \quad \text{or} \quad E_m = \frac{1}{2} C_m (\Delta V)^2 / 3600 \quad (2)$$

$$P_s = \frac{E_s}{\Delta t} \times 3600 \quad \text{or} \quad P_m = \frac{E_m}{\Delta t} \times 3600 \quad (3)$$

## 2. Calculation of interlayer spacing of the FeOCl

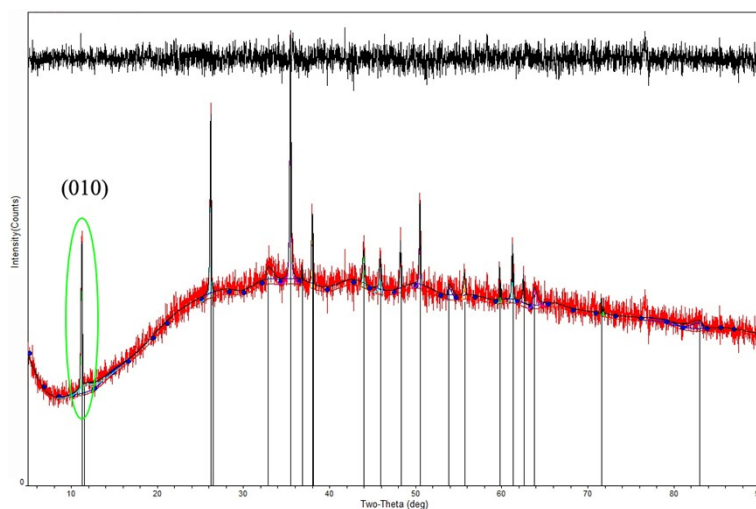

**Figure S1.** XRD pattern (thick red line) and Rietveld fit (thin black line) of FeOCl@CDCA. Rietveld fit, which was implemented by the MDI-JADE 6 program (Materials Data Inc., Livermore, CA, USA), was used to obtain the interlayer spacing of the FeOCl in FeOCl@CDCA.

FeOCl is a laminated compound and its “Van der Waals layer” suits for intercalation reactions by transferring charges between intercalated compounds and FeOCl matrix. Moreover, the space between layers can serve as a channel for migration and reactions of electrolyte ions when the interlayer spacing is larger than the hydrated ionic diameter. According to the XRD pattern (Figure 1i) and fitting results (Figure S1), the interplanar spacing of (010) plane (i.e., the interlayer spacing) can be calculated by the Bragg's equation:<sup>7</sup>

$$d = \frac{\lambda}{2 \sin \theta} \quad (4)$$

where  $d$  is the interplanar spacing,  $\lambda$  is the wavenumber of X-ray and  $\theta$  is the diffraction angle. Through calculation, the value of  $d_{010}$  is 0.783 nm.

### 3. Raman spectra of CDCA, FeOCl and FeOCl@CDCA

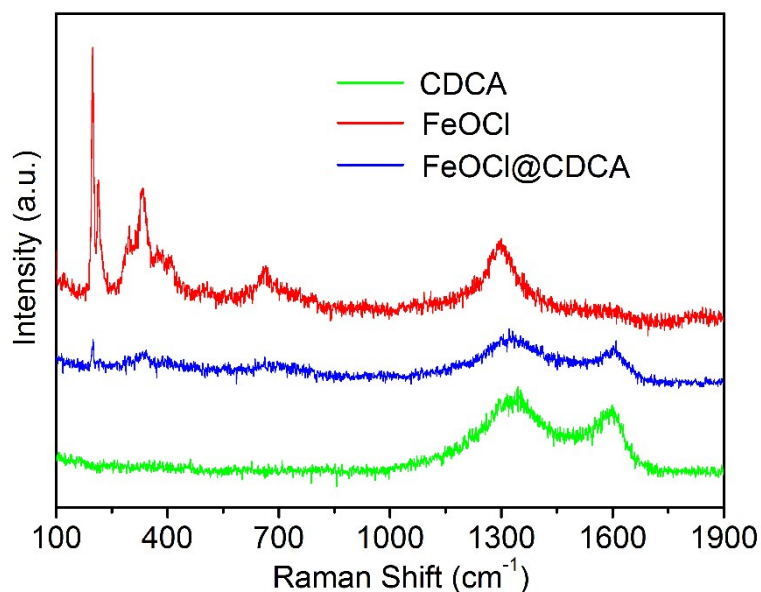

**Figure S2.** Raman spectra of CDCA, FeOCl and FeOCl@CDCA.

The Raman spectra of CDCA, FeOCl and FeOCl@CDCA are shown in Figure S2. Since the reports on Raman spectroscopy of FeOCl are rare, the assignment of the bands for FeOCl is referred to those for  $\gamma$ -FeOOH (lepidocrocite) because of their similarity on the structure. The strong peak at  $199\text{ cm}^{-1}$  is possibly derived from the Fe–Cl bond.<sup>8</sup> The broad peak at  $334\text{ cm}^{-1}$  may be attributed to the Fe–OH bond.<sup>9</sup> For FeOCl@CDCA, these two characteristic peaks of FeOCl are still maintained and we also can find two new bands centered at  $1340\text{ cm}^{-1}$  and  $1600\text{ cm}^{-1}$ . The band at  $1340\text{ cm}^{-1}$  (*D*-band) is associated with the disorder-induced scattering produced by imperfections or loss of hexagonal symmetry in the carbon structure.<sup>10</sup> This band is attributed to the  $A_{1g}$  mode and does not appear in perfect graphite crystals. Another band at  $1600\text{ cm}^{-1}$  (*G*-band) is associated with the Raman active  $2E_{2g}$  mode in two-dimensional network structure is always observed in all carbon and graphite materials.<sup>11</sup> These two characteristic



bands of carbon materials can also be identified in the Raman spectrum of CDCA. Thus, the result demonstrates the co-presence of CDCA and FeOCl in the composite.

The relative intensities ( $I_D/I_G$ ) can be used to analyze the amount of carbon defects in CDCA and FeOCl@CDCA. A low  $I_D/I_G$  ratio reveals the presence of a larger amount of  $sp^2$ -coordinated carbon.<sup>12</sup> It can be seen that the  $I_D/I_G$  ratio increases from 1.234 for CDCA to 1.263 for FeOCl@CDCA. This increment is due to the introducing of FeOCl which slightly increases defects and disorders in CDCA.

#### 4. Morphology of CDCA

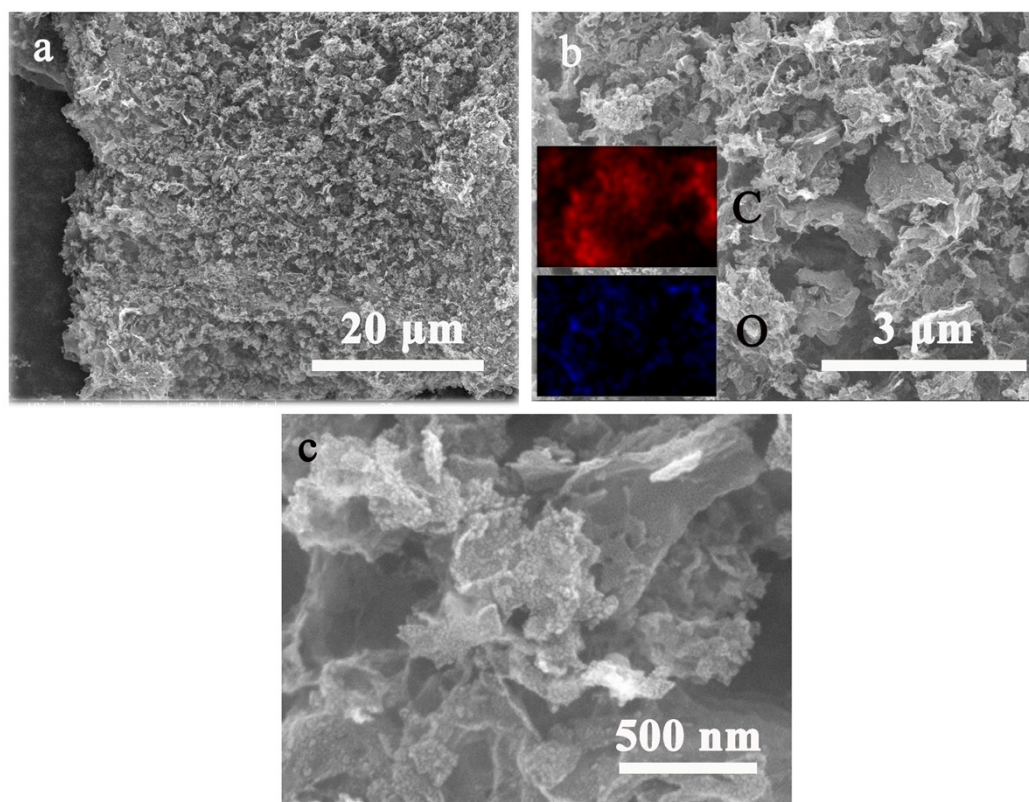

**Figure S3.** SEM images of CDCA at different magnifications, and the insets of *b* show the element mappings.

The micromorphology of CDCA was analyzed by SEM. As shown in Figure S3a and b, CDCA displays a 3D porous structure and the diameters of these pores range from nanoscale to microscale. This hierarchical and multiscale porous structure is helpful for the storage of electrolyte (shortening the diffusion distance of electrolyte ions) and migration of ions.

## 5. Surface area and pore size distribution of CDCA

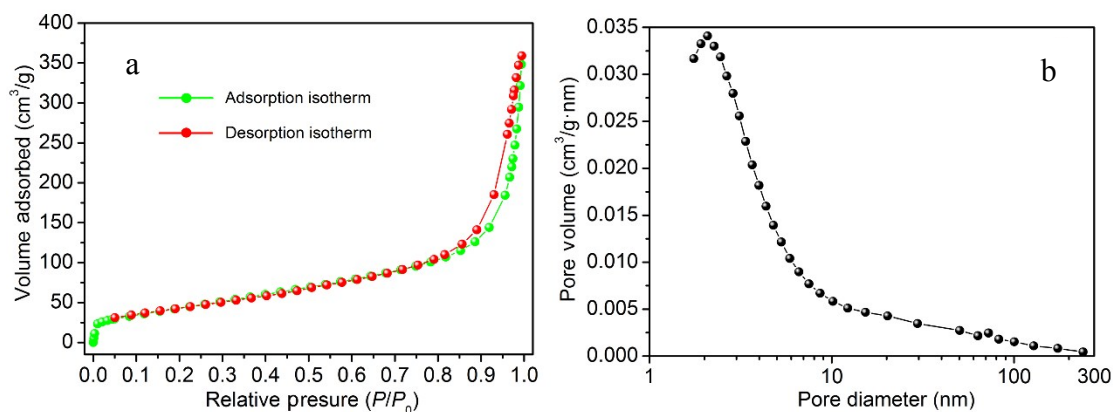

**Figure S4.** (a)  $N_2$  adsorption–desorption isotherms and (b) pore size distribution of CDCA.

The specific surface area of CDCA is calculated over a relative pressure range of 0.05–0.30 by the multipoint Brunauer–Emmett–Teller (BET) method. The nitrogen adsorption volume at the relative pressure ( $P/P_0$ ) of 0.994 is employed to determine the pore volume. The result indicates that the surface area and pore volume of CDCA are  $\sim 157 \text{ m}^2 \text{ g}^{-1}$  and  $\sim 0.53 \text{ cm}^3 \text{ g}^{-1}$ , similar to some previously reported data.<sup>13–15</sup> In addition, we can find that the surface area of CDCA is far larger than that of the FeOCl ( $\sim 40 \text{ m}^2 \text{ g}^{-1}$ ). Thus, the combination of CDCA with the FeOCl is expected to increase the reaction area and electrical conductivity of FeOCl@CDCA.

According to the  $N_2$  adsorption–desorption isotherms of CDCA (Figure S4a), the adsorption uptakes in the  $P/P_0$  range of 0 and 0.05 increase sharply, indicating the existence of micropores ( $< 2 \text{ nm}$ ). Thereafter, the isotherms form an obvious hysteresis loop and still do not reach a plateau near the  $P/P_0$  of 1.0, indicating the co-presence of mesopores (2–50 nm) and macropores ( $> 50 \text{ nm}$ ). The pore size distribution is calculated from the data of the adsorption branch by the Barrett–Joyner–Halenda (BJH) method. The result presents that the pore sizes are in the range of 1.7–239 nm (Figure S4b),

agreeing well with the speculation from the isotherms. Such a pore size distribution is favorable for electrolyte penetration, allowing reaction species to quickly access the electrode.<sup>16</sup>

## 6. CV curves of the Ni foam

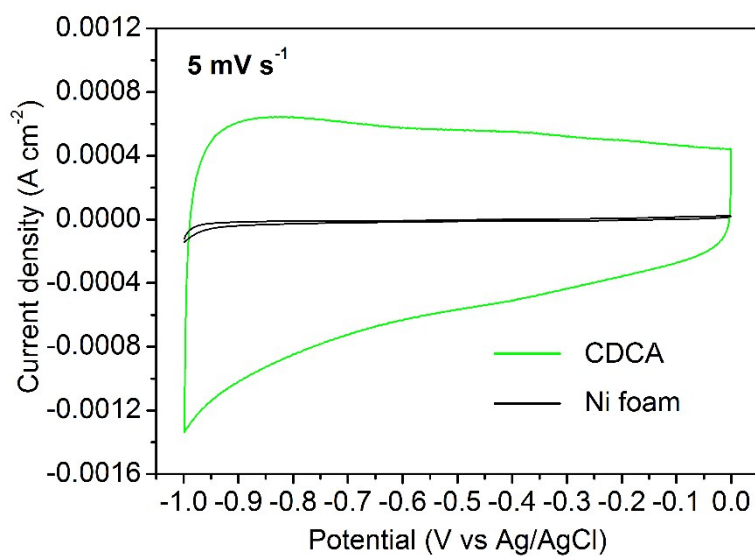

Figure S5. CV curves of CDCA and Ni foam at the scan rate of 5 mV s<sup>-1</sup>.

The CV curves of CDCA and Ni foam are shown in Figure S5. The area enclosed within CV curves corresponds to the energy storage capability. The area enclosed within the CV curve of CDCA (the smallest area among those of CDCA, FeOCl and FeOCl@CDCA, Figure 2c) is much larger than that of the Ni foam, demonstrating that the contribution of the Ni foam to the capacitance is negligible.

## 7. CV curves of CDCA and FeOCl electrodes

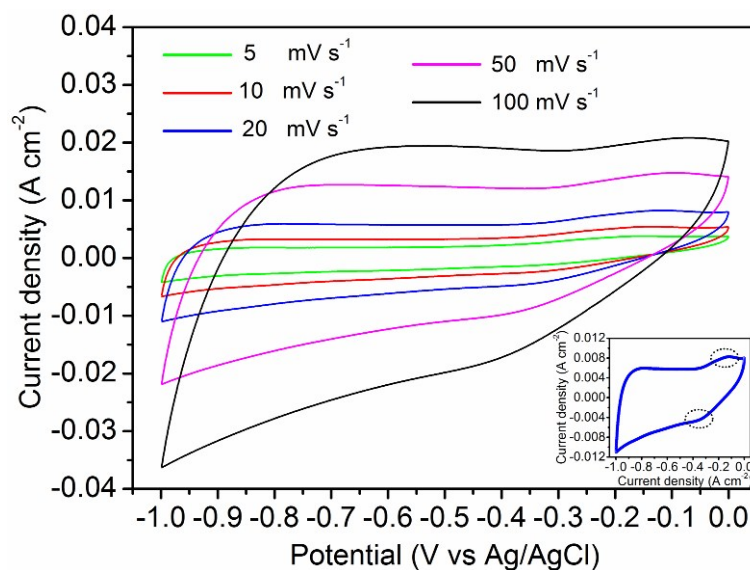

**Figure S6.** CV curves of the FeOCl electrode at scan rates of 5–100 mV s<sup>-1</sup>, and the inset shows the enlarged image of CV curve at 20 mV s<sup>-1</sup>.

The CV curves of the FeOCl electrode at scan rates of 5–100 mV s<sup>-1</sup> are presented in Figure S6, where a pair of redox peaks are identified and reflect a pseudocapacitive charging mechanism. In addition, the potential of the cathodic peaks shifts towards the negative direction while that of the anodic peaks shifts towards the positive direction with the increasing scan rate. This phenomenon is associated with the internal resistance of the electrode and further suggests the pseudocapacitive features.<sup>17</sup>

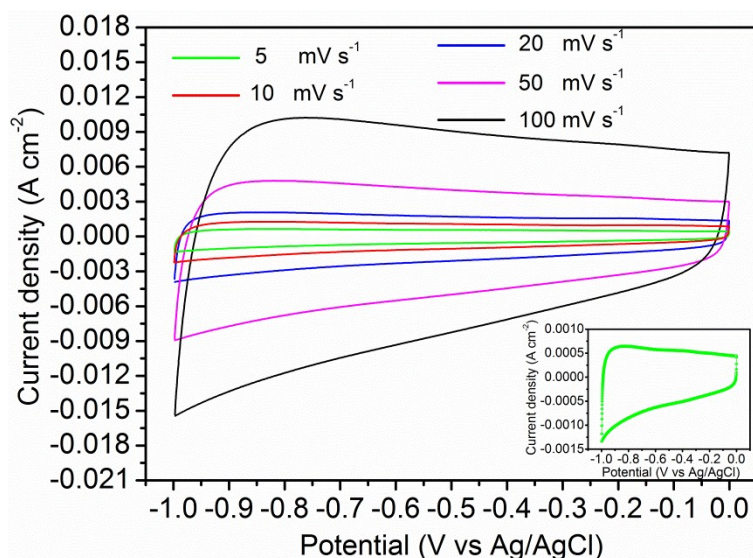

**Figure S7.** CV curves of CDCA electrode at scan rates of 5–100  $\text{mV s}^{-1}$ , and the inset shows the enlarged image of CV curve at 5  $\text{mV s}^{-1}$ .

The CV curves of CDCA electrode at scan rates of 5–100  $\text{mV s}^{-1}$  are presented in Figure S7, where a quasi-rectangular shape is identified for these CV curves and reflects an electrochemical double-layer capacitance (EDLC) feature. At the same scan rate, it is clear that the area enclosed within the CV curve of CDCA is obviously smaller than that of the FeOCl, representing a stronger energy storage capability of the FeOCl. The phenomenon is common between ELDC materials and pseudocapacitance materials due to the difference in energy storage mechanisms.<sup>18</sup>

## 8. XPS spectrum of FeOCl@CDCA after electrochemical tests

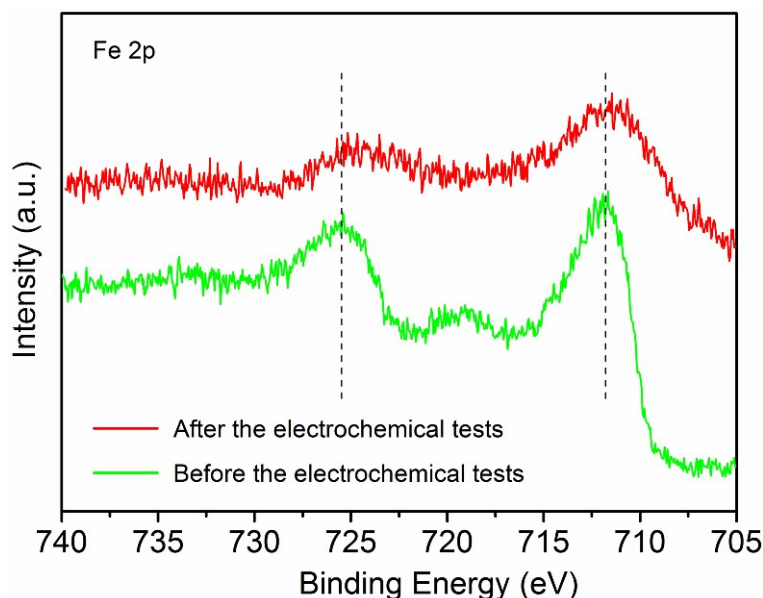

**Figure S8.** XPS spectrum of Fe 2p in FeOCl@CDCA before and after electrochemical tests.

To study changes of chemical state of Fe element before and after electrochemical tests, the XPS spectra of FeOCl@CDCA were tested and compared. As shown in Figure S8, the Fe 2p<sub>3/2</sub> peak is narrower and stronger than the Fe 2p<sub>1/2</sub> peak and the area of Fe 2p<sub>3/2</sub> peak is greater than that of Fe 2p<sub>1/2</sub> because in spin–orbit (*j–j*) coupling; Fe 2p<sub>3/2</sub> has degeneracy of four states whilst Fe 2p<sub>1/2</sub> has only two.<sup>19</sup> Before the tests, the peak positions of Fe 2p<sub>3/2</sub> and Fe 2p<sub>1/2</sub> are located at ~711.6 and 725.4 eV, suggesting that the Fe element appears as Fe(III) state.<sup>20</sup> In addition, it is known that the Fe 2p<sub>3/2</sub> peak has associated satellite peaks and the satellite peak of Fe 2p<sub>3/2</sub> for Fe(III) is generally located approximately 8 eV higher than the main Fe 2p<sub>3/2</sub> peak.<sup>21, 22</sup> In Figure S8, the shake-up satellite of Fe 2p<sub>3/2</sub> is situated at 719.3 eV, which is further representative of Fe (III). For Fe(II) state in FeO, peak positions of Fe 2p<sub>3/2</sub> and Fe 2p<sub>1/2</sub> move to lower binding energies, around 2 eV lower than those of Fe<sub>2</sub>O<sub>3</sub>.<sup>19</sup> After the tests, it is obvious



that the peaks of Fe 2p<sub>3/2</sub> and Fe 2p<sub>1/2</sub> shift to lower binding energies of 711.2 and 724.2 eV, respectively, indicative of the partial reduction of Fe(III) in FeOCl@CDCA.

## 9. CV and GCD plots of FeOCl@CDCA electrode tested in MgSO<sub>4</sub> electrolyte

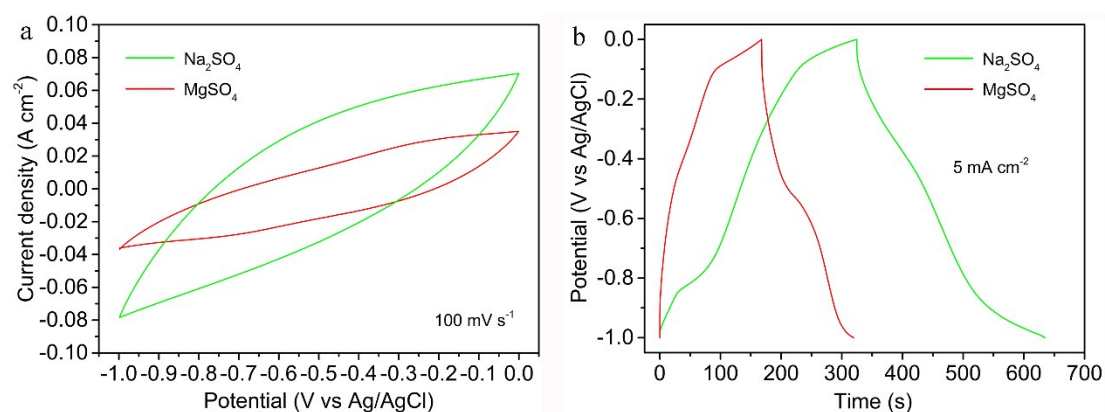

**Figure S9. Comparison of (a) CV and (b) GCD plots of FeOCl@CDCA electrode tested in MgSO<sub>4</sub> and Na<sub>2</sub>SO<sub>4</sub> electrolytes**

To strengthen the validation of the proposed Na<sup>+</sup>-intercalation mechanism, the CV and GCD curves of FeOCl@CDCA were also measured in 1 M MgSO<sub>4</sub> electrolyte. As the hydrated ionic diameter of Mg<sup>2+</sup> (0.856 nm)<sup>23</sup> is larger than that of the interlayer distance of FeOCl (0.783 nm), a notably decreased capacitance measured in the MgSO<sub>4</sub> electrolyte will help to demonstrate the intercalation mechanism. The detailed analyses are available in the main body.

## 10. Calculation of apparent diffusion coefficients

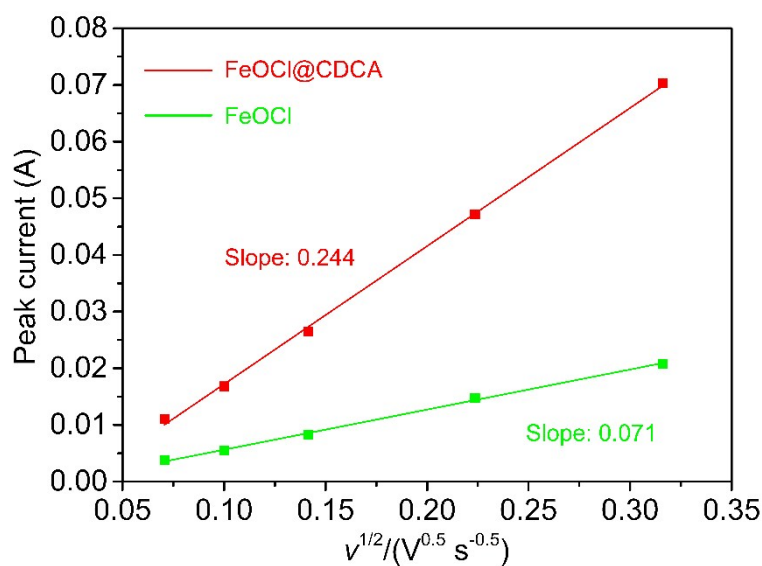

**Figure S10. Apparent diffusion coefficients of FeOCl@CDCA and FeOCl electrodes calculated by the Randles–Sevick equation.<sup>24</sup>**

According to the Randles–Sevick equation,<sup>24</sup> the apparent diffusion coefficients of the FeOCl and FeOCl@CDCA electrodes are calculated and compared for further studying their ionic transport process. The coefficients can be determined by the slope of “peak current–(scan rate)<sup>1/2</sup>” plots. A higher value represents a faster ionic diffusion rate. The detailed analyses are available in the main body.

## 11. GCD plots of CDCA and FeOCl electrodes

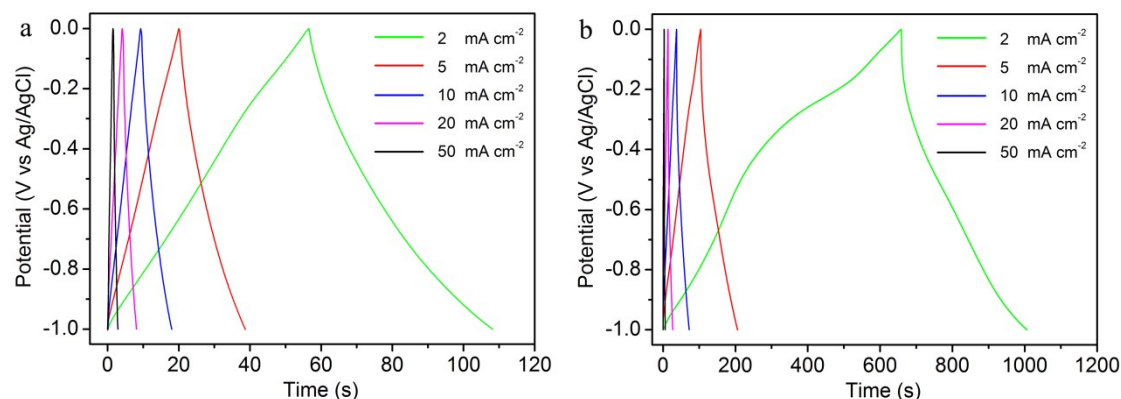

**Figure S11.** GCD plots of (a) CDCA and (b) FeOCl electrodes at current densities of 2–50 mA cm<sup>-2</sup>.

The GCD plots of CDCA and FeOCl electrodes are exhibited in Figure S11. As seen in Figure S11a, the charge curves of CDCA electrode are almost symmetric to their discharge counterparts without remarkable curvature, which reveals main contributions from EDLC. Also, no obvious IR drop appears, suggesting that CDCA possesses rapid I–V response ability and low internal resistance. In addition, the distinct curvature is identified for the GCD plots of the FeOCl (Figure S11b), reflecting its pseudocapacitive charging mechanism. Based on the discharge curves, the areal specific capacitances of the FeOCl are calculated as 696, 510, 351, 264 and 150 mF cm<sup>-2</sup> at current densities of 2, 5, 10, 20 and 50 mA cm<sup>-2</sup>. Moreover, the areal specific capacitances of CDCA are 103, 94, 87, 82 and 70 mF cm<sup>-2</sup> at 2, 5, 10, 20 and 50 mA cm<sup>-2</sup>. We can find that CDCA shows a more superior rate performance with a higher capacitance retention of 68% than that of the FeOCl (only 22%). We integrate the FeOCl with CDCA (only 4:1 ratio) by the ball-milling method and the resultant composite presents a remarkably enhanced rate capability of 54%, demonstrating the significance of combination.

## 12. Cycle stability and coulombic efficiency of the FeOCl electrode

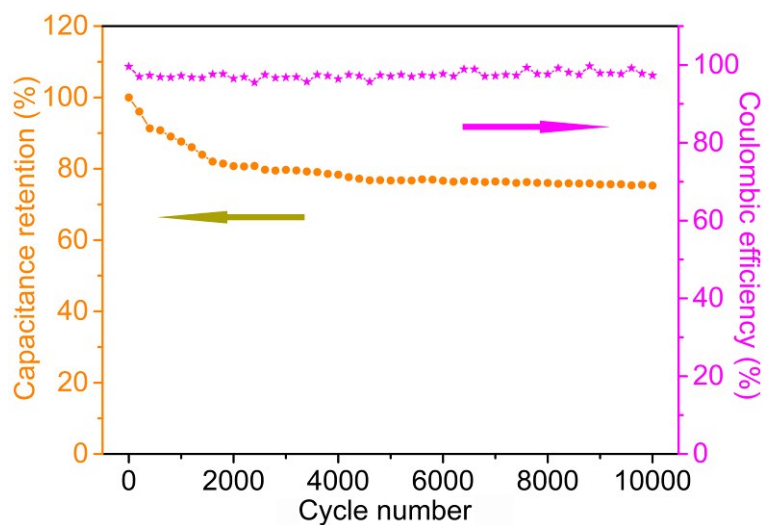

**Figure S12.** Cycle stability and coulombic efficiency of the FeOCl electrode at  $50 \text{ mA cm}^{-2}$ .

The cycle stability and coulombic efficiency of the FeOCl electrode at  $50 \text{ mA cm}^{-2}$  are shown in Figure S12. The FeOCl shows a capacitance retention of  $\sim 75\%$  after 10000 cycles, obviously lower than that of FeOCl@CDCA ( $\sim 91\%$ , Figure 3c). This result indicates that the incorporation of CDCA improves the structural stability and cycle behavior of the FeOCl composition. In addition, the FeOCl maintains a high coulombic efficiency of  $95\%–100\%$ , which is similar to that of FeOCl@CDCA ( $96\%–100\%$ ).

### 13. Calculation of FeOCl theoretical specific capacitance

The theoretical pseudocapacitance of FeOCl is calculated based on the following equation:<sup>25</sup>

$$C = \frac{n \times F}{M \times V} \quad (5)$$

where  $n$  is the mean number of the electrons transferred in the redox reaction,  $F$  is the Faraday constant,  $M$  is the molar mass of the metal oxide and  $V$  is the operating voltage window. Therefore, we can acquire the theoretical capacitance of FeOCl as:

$$(1 \times 96485.3383 / 1.0 / 107.2971) \text{ F g}^{-1} \approx 899 \text{ F g}^{-1}.$$

#### 14. Electrochemical properties of the MnO<sub>2</sub> electrode

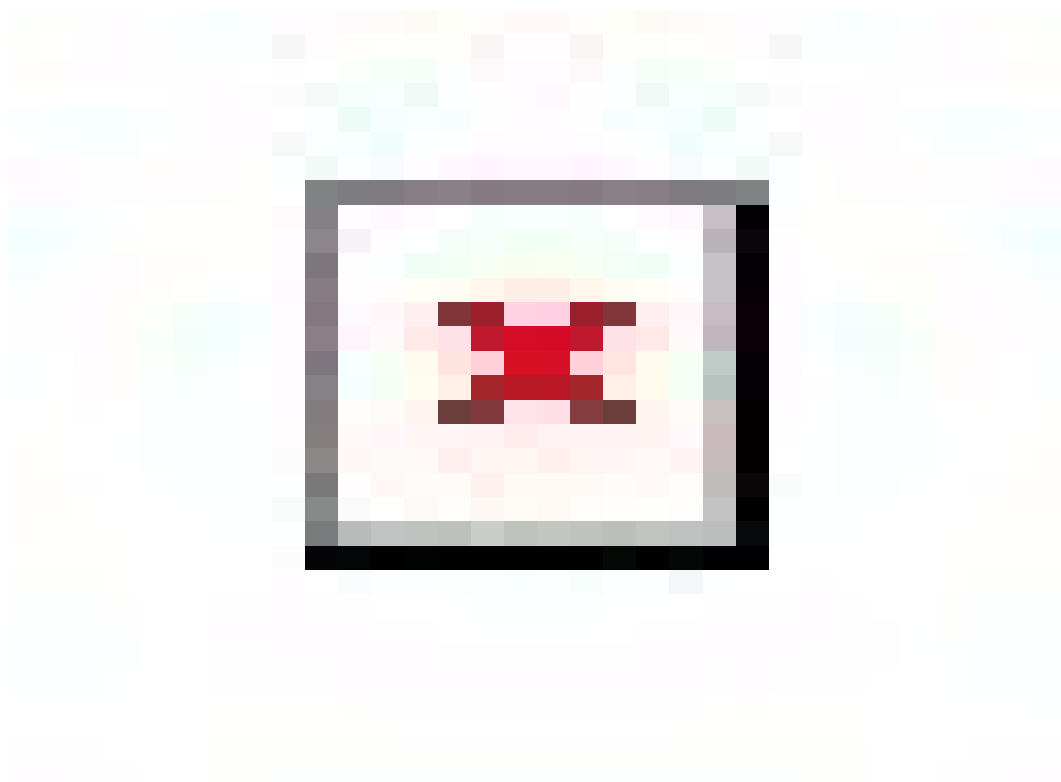

**Figure S13.** Electrochemical properties of the MnO<sub>2</sub> electrode: (a) CV curves at scan rates of 5–100 mV s<sup>-1</sup>, and the inset shows the enlarged image of the CV curve at 5 mV s<sup>-1</sup>; (b) GCD curves at current densities of 2–50 mA cm<sup>-2</sup>; (c) rate performance; (d) Nyquist plot and the inset shows the enlarged image at the high-frequency region.

The low-cost MnO<sub>2</sub> electrode was chosen as a cathode to assemble an ASC with FeOCl@CDCA as an anode. The electrochemical performances of the MnO<sub>2</sub> electrode were studied by CV, GCD and EIS in a three-electrode system. Its CV responses at different scan rates are displayed in Figure S13a. The relatively symmetrical rectangular shape indicates that the electrode has an ideal electrochemical capacitance behavior. In addition, during the charging–discharging steps (Figure S13b), the charging curves of the electrode are almost symmetric to their corresponding discharge

counterparts with slight curvature, indicating contributions from both pseudocapacitive and double layer. Based on the equation 1, the areal specific capacitances of the  $\text{MnO}_2$  electrode can be calculated as 318, 285, 261, 228 and 169  $\text{mF cm}^{-2}$  (127, 114, 104, 91 and 68  $\text{F g}^{-1}$ ) at the current densities of 2, 5, 10, 20 and 50  $\text{mA cm}^{-2}$  (Figure S13c). Although the values are slightly lower than those of some previously reported  $\text{MnO}_2$ -based electrodes,<sup>26-29</sup> the electrode has some important advantages including simple preparation process and low cost, which may be more appropriate for large-scale production. In addition, a high capacitance retention of 53% with the increase of the current density from 2 to 50  $\text{mA cm}^{-2}$  reflects its good rate property. EIS was applied to quantify their conductive and diffusive behavior. As seen in Figure S13d, the electrode has a low solution resistance and charge transfer resistance and the nearly vertical line in the low-frequency region suggests its good capacitive behavior.



## 15. Tables

**Table S1.** Physical and electrochemical properties reported in recent literature for anode materials  
in various aqueous electrolytes.

| Electrode                                              | Capacitance/F g <sup>-1</sup>  | Cycling stability    | Surface<br>area/m <sup>2</sup> g <sup>-1</sup> | Electrolyte                          | Potential<br>range/V | Mass<br>loading/<br>mg cm <sup>-2</sup> | Ref. <sup>c)</sup> |
|--------------------------------------------------------|--------------------------------|----------------------|------------------------------------------------|--------------------------------------|----------------------|-----------------------------------------|--------------------|
| $\gamma$ -Fe <sub>2</sub> O <sub>3</sub> /graphene     | 76 (25 mV s <sup>-1</sup> )    | 97% (1000 cycles)    | –                                              | 1 M Na <sub>2</sub> SO <sub>3</sub>  | –0.8~0               | 1.25                                    | 35                 |
| Mesoporous MoO <sub>2</sub>                            | 146 (5 mV s <sup>-1</sup> )    | 90% (1000 cycles)    | 69                                             | 1 M LiOH                             | –0.5~1.2             | 4                                       | 36                 |
| Polypyrrole@V <sub>2</sub> O <sub>5</sub>              | 308 (0.1 A g <sup>-1</sup> )   | –                    | –                                              | 0.5 M K <sub>2</sub> SO <sub>4</sub> | –0.9~0.1             | 6                                       | 12                 |
| Ti–Fe <sub>2</sub> O <sub>3</sub> @PEDOT <sup>a)</sup> | 311.6 (1 mA cm <sup>-2</sup> ) | ~100% (30000 cycles) | –                                              | 5 M LiCl                             | –0.8~0               | 3.7                                     | 37                 |
| Highly<br>functionalized<br>activated carbons          | 525 (0.25 A g <sup>-1</sup> )  | 90.6% (10000 cycles) | 1217.1                                         | 1 M KOH                              | –1~0                 | 1                                       | 38                 |
| Iron<br>nanosheets/graphene                            | 717 (2 mV s <sup>-1</sup> )    | 80% (1000 cycles)    | 218                                            | 6 M KOH                              | –1.2~0               | –                                       | 39                 |
| FeOOH<br>nanoparticles                                 | 1066 (1 A g <sup>-1</sup> )    | 91% (10000 cycles)   | –                                              | 2 M KOH                              | –1.2~0               | 1.6                                     | 40                 |
| Nano-sized<br>columned $\beta$ -FeOOH                  | 116 (0.5 A g <sup>-1</sup> )   | –                    | –                                              | 1 M Li <sub>2</sub> SO <sub>4</sub>  | –0.85~–0.1           | 10                                      | 41                 |
| FeOOH<br>nanorod/carbon tube<br>network                | 396 (0.5 A g <sup>-1</sup> )   | 83% (5000 cycles)    | 274                                            | 6 M KOH                              | –1.08~0              | 2                                       | 42                 |
| CDCA                                                   | 41.2 (0.8 A g <sup>-1</sup> )  | –                    | 157                                            | 1 M Na <sub>2</sub> SO <sub>4</sub>  | –1~0                 | 2.5                                     | This study         |
| FeOCl                                                  | 278 (0.8 A g <sup>-1</sup> )   | 75% (10000 cycles)   | 40                                             | 1 M Na <sub>2</sub> SO <sub>4</sub>  | –1~0                 | 2.5                                     | This study         |
| FeOCl@CDCA                                             | 647 (0.8 A g <sup>-1</sup> )   | 91% (10000 cycles)   | 56                                             | 1 M Na <sub>2</sub> SO <sub>4</sub>  | –1~0                 | 2.5                                     | This study         |

<sup>a)</sup>PEDOT: poly(3,4-ethylenedioxythiophene); <sup>b)</sup>RGO: reduced graphene oxide; <sup>c)</sup>Please find these references in the manuscript.

**Table S2.** Comparison of the areal specific capacitance, areal energy density and cycling stability of the MnO<sub>2</sub>//FeOCl@CDCA ASC with some recently reported ASCs storing energy by Faradaic reactions.

| Devices                                                         | Maximum areal<br>specific capacitance<br>(mF cm <sup>-2</sup> ) | Maximum areal energy<br>density (μW h cm <sup>-2</sup> ) | Cycling stability    | Potential<br>range (V) | Electrolyte                         | Refs <sup>e)</sup> |
|-----------------------------------------------------------------|-----------------------------------------------------------------|----------------------------------------------------------|----------------------|------------------------|-------------------------------------|--------------------|
| CuSe@Co(OH) <sub>2</sub> //AC <sup>a)</sup>                     | 13.2 (0.3 mA cm <sup>-2</sup> )                                 | 5.1 (~165 μW cm <sup>-2</sup> )                          | 80.4% (10000 cycles) | 0–1.5                  | PVA/KOH                             | 49                 |
| RGO/MnO <sub>2</sub> //RGO <sup>b)</sup>                        | 113 (0.01 A g <sup>-1</sup> )                                   | 35.1 (37.5 μW cm <sup>-2</sup> )                         | 84% (3600 cycles)    | 0–1.5                  | 1 M Na <sub>2</sub> SO <sub>4</sub> | 50                 |
| RGO–Co <sub>3</sub> O <sub>4</sub> //RGO                        | 136.6 (2 mA cm <sup>-2</sup> )                                  | 35.92 (1.38 mW cm <sup>-2</sup> )                        | 95.5% (6000 cycles)  | 0–1.4                  | PVA/KOH                             | 51                 |
| NC LDH<br>NSs@Ag@CC//AC <sup>c)</sup>                           | 230.2 (1 mA cm <sup>-2</sup> )                                  | 78.8 (785 μW cm <sup>-2</sup> )                          | 88.1% (2000 cycles)  | 0–1.6                  | 1 M KOH                             | 52                 |
| CoMoO <sub>4</sub> @Ni foam//AC                                 | ~417 (5 mA cm <sup>-2</sup> )                                   | 125 (1.5 mW cm <sup>-2</sup> )                           | –                    | 0–1.5                  | 2 M KOH                             | 53                 |
| MnO/Au NP <sup>d)</sup> //Fe <sub>3</sub> O <sub>4</sub> /Au NP | 344.1 (1 mA cm <sup>-2</sup> )                                  | 267.3 (~2 mW cm <sup>-2</sup> )                          | 89.8% (5000 cycles)  | 0–2 V                  | 1 M Na <sub>2</sub> SO <sub>4</sub> | 54                 |
| MnO <sub>2</sub> //FeOCl@CDCA                                   | 641 (2 mA cm <sup>-2</sup> )                                    | 289 (1.8 mW cm <sup>-2</sup> )                           | 88.7% (10000 cycles) | 0–1.8                  | 1 M Na <sub>2</sub> SO <sub>4</sub> | This work          |

<sup>a)</sup>AC: activated carbon; <sup>b)</sup>RGO: reduced graphene oxide; <sup>c)</sup>NC LDH NSs@Ag@CC//AC: Nickel-cobalt layered double hydroxide nanosheets@Ag@carbon cloth//activated carbon; <sup>d)</sup>NC: nanoparticles; <sup>e)</sup>Please find these references in the manuscript.

## References

- [1] Herber, R. H., & Cassell, R. A. (1981). Synthesis, hyperfine interactions, and lattice dynamics of a crown ether intercalation compound of FeOCl. *The Journal of Chemical Physics*, 75(9), 4669-4678.
- [2] Wan, C., & Li, J. (2015). Facile synthesis of well-dispersed superparamagnetic  $\gamma$ -Fe<sub>2</sub>O<sub>3</sub> nanoparticles encapsulated in three-dimensional architectures of cellulose aerogels and their applications for Cr (VI) removal from contaminated water. *ACS Sustainable Chemistry & Engineering*, 3(9), 2142-2152.
- [3] Wan, C., Lu, Y., Jiao, Y., Cao, J., Sun, Q., & Li, J. (2015). Preparation of mechanically strong and lightweight cellulose aerogels from cellulose-NaOH/PEG solution. *Journal of Sol-Gel Science and Technology*, 74(1), 256-259.
- [4] Wan, C., & Li, J. (2016). Graphene oxide/cellulose aerogels nanocomposite: Preparation, pyrolysis, and application for electromagnetic interference shielding. *Carbohydrate Polymers*, 150, 172-179.
- [5] Wang, J. G., Yang, Y., Huang, Z. H., & Kang, F. (2013). Effect of temperature on the pseudo-capacitive behavior of freestanding MnO<sub>2</sub>@carbon nanofibers composites electrodes in mild electrolyte. *Journal of Power Sources*, 224, 86-92.
- [6] Lu, Q., Lattanzi, M. W., Chen, Y., Kou, X., Li, W., Fan, X., Unruh, K. M., Chen, J. G., & Xiao, J. Q. (2011). Supercapacitor electrodes with high-energy and power densities prepared from monolithic NiO/Ni nanocomposites. *Angewandte Chemie International Edition*, 50(30), 6847-6850.
- [7] Bond, W. L. (1960). Precision lattice constant determination. *Acta Crystallographica*, 13(10), 814-818.

- [8] Yang, X. J., Tian, P. F., Zhang, X. M., Yu, X., Wu, T., Xu, J., & Han, Y. F. (2015). The generation of hydroxyl radicals by hydrogen peroxide decomposition on FeOCl/SBA-15 catalysts for phenol degradation. *AIChE Journal*, 61(1), 166-176.
- [9] Avery, J. S., Burbridge, C. D., & Goodgame, D. M. L. (1968). Raman spectra of tetrahalo-anions of FeIII, MnII, FeII, CuII and ZnII. *Spectrochimica Acta Part A: Molecular Spectroscopy*, 24(11), 1721-1726.
- [10] Ferrari, A. C., & Robertson, J. (2000). Interpretation of Raman spectra of disordered and amorphous carbon. *Physical review B*, 61(20), 14095.
- [11] Maldonado-Hódar, F. J., Moreno-Castilla, C., Rivera-Utrilla, J., Hanzawa, Y., & Yamada, Y. (2000). Catalytic graphitization of carbon aerogels by transition metals. *Langmuir*, 16(9), 4367-4373.
- [12] Ji, L., Toprakci, O., Alcoutlabi, M., Yao, Y., Li, Y., Zhang, S., Guo, B., & Zhang, X. (2012).  $\alpha$ -Fe<sub>2</sub>O<sub>3</sub> nanoparticle-loaded carbon nanofibers as stable and high-capacity anodes for rechargeable lithium-ion batteries. *ACS Applied Materials & Interfaces*, 4(5), 2672-2679.
- [13] Grzyb, B., Hildenbrand, C., Berthon-Fabry, S., Bégin, D., Job, N., Rigacci, A., & Achard, P. (2010). Functionalisation and chemical characterisation of cellulose-derived carbon aerogels. *Carbon*, 48(8), 2297-2307.
- [14] Meng, Y., Young, T. M., Liu, P., Contescu, C. I., Huang, B., & Wang, S. (2015). Ultralight carbon aerogel from nanocellulose as a highly selective oil absorption material. *Cellulose*, 22(1), 435-447.
- [15] Wan, C., Lu, Y., Jiao, Y., Jin, C., Sun, Q., & Li, J. (2015). Fabrication of hydrophobic, electrically conductive and flame-resistant carbon aerogels by pyrolysis of regenerated cellulose

aerogels. Carbohydrate Polymers, 118, 115-118.

[16] Saliger, R., Fischer, U., Herta, C., & Fricke, J. (1998). High surface area carbon aerogels for supercapacitors. Journal of Non-Crystalline Solids, 225, 81-85.

[17] Kumar, R., Rai, P., & Sharma, A. (2016). 3D urchin-shaped  $\text{Ni}_3(\text{VO}_4)_2$  hollow nanospheres for high-performance asymmetric supercapacitor applications. Journal of Materials Chemistry A, 4(25), 9822-9831.

[18] Salanne, M., Rotenberg, B., Naoi, K., Kaneko, K., Taberna, P. L., Grey, C. P., Dunn, B., & Simon, P. (2016). Efficient storage mechanisms for building better supercapacitors. Nature Energy, 1(6), 16070.

[19] Yamashita, T., & Hayes, P. (2008). Analysis of XPS spectra of  $\text{Fe}^{2+}$  and  $\text{Fe}^{3+}$  ions in oxide materials. Applied Surface Science, 254(8), 2441-2449.

[20] Li, L., Chu, Y., Liu, Y., & Dong, L. (2007). Template-free synthesis and photocatalytic properties of novel  $\text{Fe}_2\text{O}_3$  hollow spheres. The Journal of Physical Chemistry C, 111(5), 2123-2127.

[21] Hawn, D. D., & DeKoven, B. M. (1987). Deconvolution as a correction for photoelectron inelastic energy losses in the core level XPS spectra of iron oxides. Surface and Interface Analysis, 10(2-3), 63-74.

[22] Muhler, M., Schlögl, R., & Ertl, G. (1992). The nature of the iron oxide-based catalyst for dehydrogenation of ethylbenzene to styrene 2. Surface chemistry of the active phase. Journal of Catalysis, 138(2), 413-444.

[23] Nightingale Jr, E. R. (1959). Phenomenological theory of ion solvation. Effective radii of hydrated ions. The Journal of Physical Chemistry, 63(9), 1381-1387.

[24] Wang, X., Niu, C., Meng, J., Hu, P., Xu, X., Wei, X., Zhou, L., Zhao, K., Luo, W., Yan, M.,

- & Mai, L. (2015). Novel  $K_3V_2(PO_4)_3/C$  bundled nanowires as superior sodium-ion battery electrode with ultrahigh cycling stability. *Advanced Energy Materials*, 5(17), 1500716.
- [25] Yu, X., Lu, B., & Xu, Z. (2014). Super long-life supercapacitors based on the construction of nanohoneycomb-like strongly coupled  $CoMoO_4$ -3D graphene hybrid electrodes. *Advanced Materials*, 26(7), 1044-1051.
- [26] Lei, Z., Shi, F., & Lu, L. (2012). Incorporation of  $MnO_2$ -coated carbon nanotubes between graphene sheets as supercapacitor electrode. *ACS Applied Materials & Interfaces*, 4(2), 1058-1064.
- [27] Peng, Y., Chen, Z., Wen, J., Xiao, Q., Weng, D., He, S., Geng, H., & Lu, Y. (2011). Hierarchical manganese oxide/carbon nanocomposites for supercapacitor electrodes. *Nano Research*, 4(2), 216-225.
- [28] Chen, S., Zhu, J., Wu, X., Han, Q., & Wang, X. (2010). Graphene oxide- $MnO_2$  nanocomposites for supercapacitors. *ACS Nano*, 4(5), 2822-2830.
- [29] Fan, Z., Yan, J., Wei, T., Zhi, L., Ning, G., Li, T., & Wei, F. (2011). Asymmetric supercapacitors based on graphene/ $MnO_2$  and activated carbon nanofiber electrodes with high power and energy density. *Advanced Functional Materials*, 21(12), 2366-2375.
